# Supplementary material
Source: Springer Nature journal article supplement (https://www.springermedizin.de/resource/supplementary/12967_2010_796_MOESM8_ESM.pdf/9577068)

**a**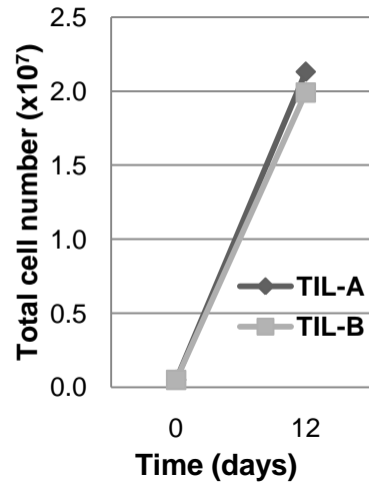**b**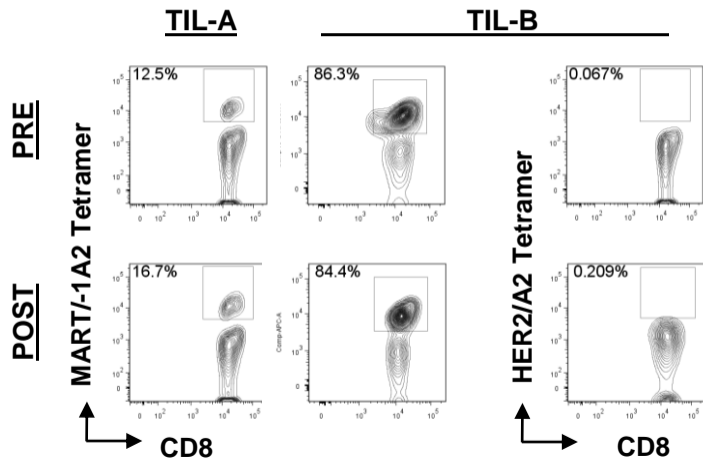**c**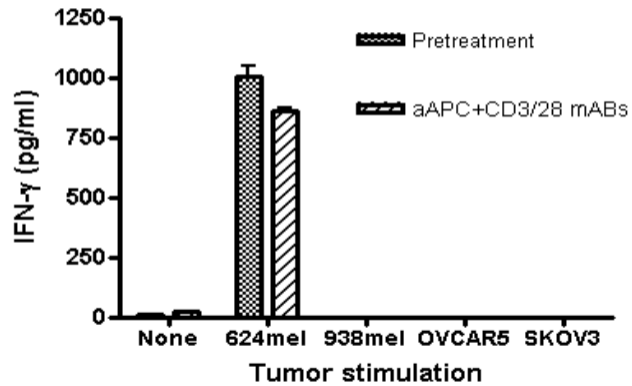

Supplement: MOESM8 [file 9577068]
